# Supplementary material for: Partial Substitution of Urea with Biochar Induced Improvements in Soil Enzymes Activity, Ammonia-Nitrite Oxidizers, and Nitrogen Uptake in the Double-Cropping Rice System
Source: MDPI journal article supplement (doi:10.3390/microorganisms11020527), 2023-02-19
Supplement: s1 [file s1]

## Supplementary file (S1)

### Primer information

| Target group | Primer name | Primer sequence       | Fragment length (bp) | References |
|--------------|-------------|-----------------------|----------------------|------------|
| AOB          | amoA-1F     | GGGGTTTCTACTGGTGGT    | 491                  | [1]        |
|              | amoA-2R     | CCCCTCKGSAAAGCCTTCTTC |                      |            |
| AOA          | Arch-amoAF  | STAATGGTCTGGCTTAGACG  | 635                  | [2]        |
|              | Arch-amoAR  | GCGGCCATCCATCTGTATGT  |                      |            |
| NOB          | F           | TACATGTGGTGGAAACA     | 485                  | [3]        |
|              | R           | CGGTTCTGGTCRATCA      |                      |            |

Note: AOB; ammonia oxidizing bacteria, AOA; ammonia oxidizing archaea, NOB; nitrite oxidizing bacteria

## Supplementary file (S2)

### Polymerase chain reaction (PCR) reaction system

| Component              | Volume  |
|------------------------|---------|
| 2×PCR Master Mix       | 12.5 µl |
| Forward primer (10 µM) | 0.5 µl  |
| Reverse Primer (10 µM) | 0.5 µl  |
| Template (mixed DNA)   | 1 µl    |
| ddH <sub>2</sub> O     | 25 µl   |

Setting of primer amplification conditions: 94°C for 5 min; 94°C for 30 s, 60°C for 30 s, 72°C for 30 s, 35 cycles; 72°C for 10 min. The products were subjected to agarose gel electrophoresis as follows:

Amplification curve: 94°C for 30 s; 94°C for 10 s, 60°C for 12 s, 72°C 30 s for 40 cycles, 72°C single point detection signal.

**Thymine-Adenine (TA) cloning reaction system**

| Component                                        | Volume     |
|--------------------------------------------------|------------|
| The purified PCR product/or PCR1 ul 1 kb control | 1 $\mu$ l  |
| PMD-19T Vector                                   | 1 $\mu$ l  |
| 10 $\times$ Enhancer                             | 1 $\mu$ l  |
| Sterilized water                                 | 10 $\mu$ l |

**Fluorescent quantitative polymerase chain reaction (FQ-PCR) system**

| Component                        | Volume      | Final concentration |
|----------------------------------|-------------|---------------------|
| SYBR Premix Ex Taq (2 $\times$ ) | 10 $\mu$ l  | 1 $\times$          |
| Forward Primer (10 $\mu$ M)      | 0.8 $\mu$ l | 0.4 $\mu$ M         |
| Reverse Primer (10 $\mu$ M)      | 0.8 $\mu$ l | 0.4 $\mu$ M         |
| Genomic DNA                      | 1 $\mu$ l   |                     |
| ddH <sub>2</sub> O               | 20 $\mu$ l  |                     |

Fluorescence quantitative PCR amplification conditions setting:

Amplification curve: 94°C for 30 s; 94°C for 10 s, 60°C for 12 s, 72°C 30 s for 40 cycles, 72°C single point detection signal.

Dissolution curve: 95°C 0 s, 65°C 15 s, 95°C 0 s, continuous detection signal.

**References:**

- [1] Rotthauwe JH, Witzel KP, Liesack W (1997) The ammonia monooxygenase structural gene *amoA* as a functional marker: molecular fine-scale analysis of natural ammonia-oxidizing populations. Appl Environ Microbiol 63:4704-4712

- [2] Nicol GW, Leininger S, Schleper C, Prosser JI (2008) The influence of soil pH on the diversity, abundance and transcriptional activity of ammonia oxidizing archaea and bacteria. *Environ Microbiol* 10:2966–2978
- [3] Pester M, Maixner F, Berry D, Rattei T, Koch H, Lückner S, Nowka B, Richter A, Spieck E, Lebedeva E, Loy A, Wagner M, Daims H (2014) NxrB encoding the beta subunit of nitrite oxidoreductase as functional and phylogenetic marker for nitrite-oxidizing Nitrospira. *Environ Microbiol* 16:3055–3071
